# Supplementary material for: Photodynamic Therapy Using Talaporfin Sodium for Local Failure after Chemoradiotherapy or Radiotherapy for Esophageal Cancer: A Single Center Experience
Source: MDPI journal article supplement (doi:10.3390/jcm9051509), 2020-05-17
Supplement: s1 [file s1]

## Supplemental material

**Table S1. Patients' data with esophageal stricture after PDT: baseline characteristics at prior treatment and results of PDT**

| Patients |     |     | Baseline characteristics at prior treatment |                   |                                |                           |                                 | Results of PDT |                |                             |                                 |                                       |                               |                |                                         |                        |                               |
|----------|-----|-----|---------------------------------------------|-------------------|--------------------------------|---------------------------|---------------------------------|----------------|----------------|-----------------------------|---------------------------------|---------------------------------------|-------------------------------|----------------|-----------------------------------------|------------------------|-------------------------------|
| Case     | Sex | Age | Tumor location                              | Histological type | cStage at pretreatment         | Prior treatment (regimen) | Total dose of radiotherapy (Gy) | Tumor status   | Invasion depth | Circumference of the lesion | Longitudinal lesion length (cm) | Interval between CRT and PDT (months) | Total dose of irradiation (J) | Local efficacy | Period until onset of stenosis (months) | Required number of EBD | Outcome                       |
| 1        | F   | 75  | Middle                                      | SCC               | T3N0M0, cStage II              | CRT CDDP+5-FU             | 70                              | Recurrence     | SM             | 1/2                         | 4                               | 132                                   | 700                           | L-CR           | 4                                       | 7                      | Survival: 36 months after PDT |
| 2        | M   | 69  | Lower                                       | SCC               | T4N0M0, cStage IV <sub>A</sub> | CRT CDDP+5-FU             | 60                              | Recurrence     | SM             | 1/3                         | 2                               | 192                                   | 650                           | L-CR           | 5                                       | 4                      | Survival: 32 months after PDT |
| 3        | F   | 63  | Middle                                      | SCC               | T4N0M0, cStage IV <sub>A</sub> | CRT CDDP+5-FU             | 60                              | Recurrence     | M              | 1/3                         | 2                               | 120                                   | 400                           | L-CR           | 9                                       | 2                      | Survival: 29 months after PDT |
| 4        | F   | 72  | Middle                                      | SCC               | T1bN0M0, cStage I              | CRT CDDP+5-FU             | 60                              | Recurrence     | SM             | 1/4                         | 1                               | 7                                     | 400                           | L-CR           | 3                                       | 5                      | Survival: 21 months after PDT |
| 5        | M   | 69  | Upper                                       | SCC               | T1bN0M0, cStage I              | CRT CDDP+5-FU             | 60                              | Residual       | SM             | 1                           | 2                               | 8                                     | 1100*                         | L-CR           | 1                                       | 10                     | Survival: 13 months after PDT |

PDT, photodynamic therapy; SCC, squamous cell carcinoma; CRT, chemoradiotherapy; CDDP, cisplatin; CDGP, nedaplatin; L-CR, local complete response, EBD; endoscopic balloon dilation

\* Total dose of three PDTs
